# Supplementary material for: A self-referenced nanodosimeter for reaction based ratiometric imaging of hypochlorous acid in living cells
Source: Royal Society of Chemistry journal article supplement (doi:10.1039/c2sc21485g), 2012-10-04
Supplement: c2sc21485g.pdf [file c2sc21485g.pdf]

## Supporting Information

# A self-referenced nanodosimeter for reaction based ratiometric imaging of hypochlorous acid in living cells

Xuanjun Wu,<sup>a</sup> Zhu Li,<sup>a</sup> Liu Yang,<sup>a</sup> Jiahuai Han<sup>b</sup> and Shoufa Han<sup>a,\*</sup>

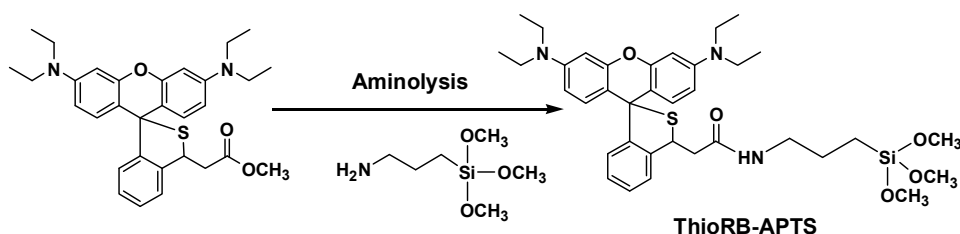

Scheme S1. Synthesis of ThioRB-APTS

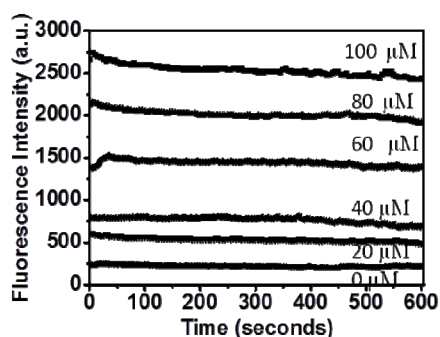

Fig. S1 Kinetic analysis of the reaction rates between ThioRB-FITC-MSN ( $1 \text{ mg ml}^{-1}$ ) and NaOCl (0-100  $\mu\text{M}$  as indicated). The fluorescence emission intensity at 586 nm was recorded as a function of time using an excitation wavelength of 560 nm.

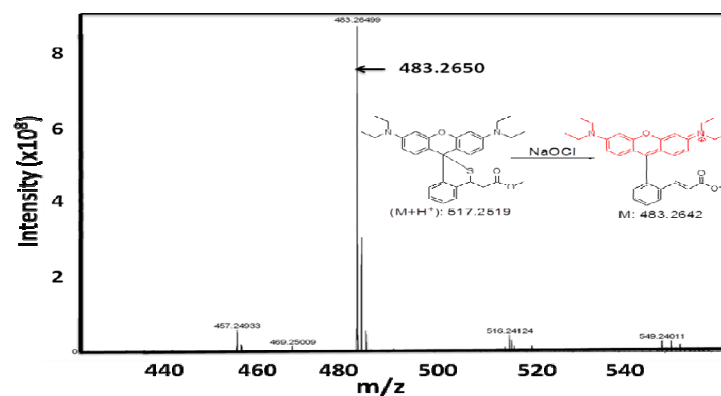

Fig. S2 Genesis of RB-CM from ThioRB-ester in aqueous acetonitrile (50%) supplemented with NaOCl.

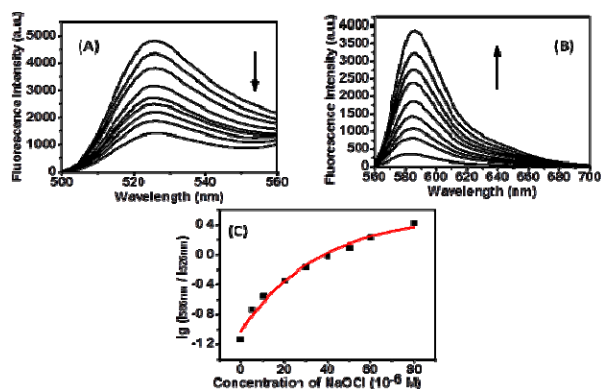

**Fig. S3** Fluorescence emission spectra of FITC and activated ThioRB displayed on MSN ( $1 \text{ mg ml}^{-1}$ ) in  $\text{Na}_2\text{HPO}_4$ -citrate buffer (100 mM, pH 5) containing various amounts of NaOCl. Analyte concentration: 0, 5, 10, 20, 30, 40, 50, 60, and  $80 \mu\text{M}$ . (A) The fluorescence emission intensity of FITC was obtained using an excitation wavelength at 490 nm; (B) the fluorescence emission intensity of activated ThioRB was obtained using an excitation wavelength at 560 nm; (C) the titration curve was plotted by fluorescence emission intensity at 586 nm over that at 526 nm as a function of HOCl concentration.

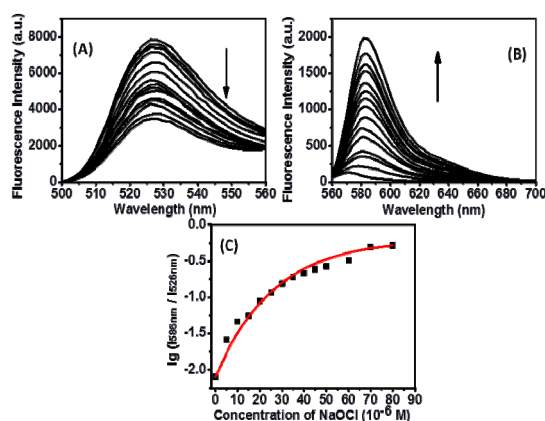

**Fig. S4** Fluorescence emission spectra of FITC and activated ThioRB doped in MSN ( $1 \text{ mg ml}^{-1}$ ) in PBS (pH 7.4) containing various amounts of NaOCl (0, 5, 10, 15, 20, 25, 30, 35, 40, 45, 50, 60, 70, and  $80 \mu\text{M}$ ). (A) The fluorescence emission intensity of FITC was obtained using an excitation wavelength of 490 nm; (B) the fluorescence emission intensity of activated ThioRB was obtained using an excitation wavelength at 560 nm; (C) the titration curve was plotted by fluorescence emission intensity at 586 nm over that at 526 nm as a function of HOCl concentration.

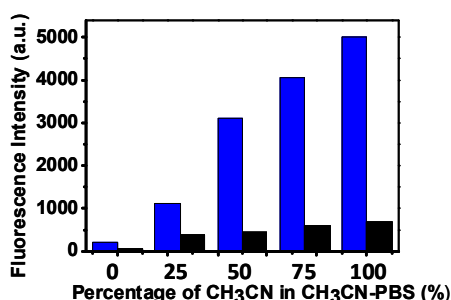

**Fig. S5** Fluorescence emission of ThioRB-ester ( $10 \mu\text{M}$ ) in PBS (100 mM, pH 7.4) buffered  $\text{CH}_3\text{CN}$  (0, 25%, 50%, 75% and 100%, v/v of PBS/  $\text{CH}_3\text{CN}$ ) supplemented with or without NaOCl ( $100 \mu\text{M}$ ). The blue columns showed the fluorescence of ThioRB-ester in PBS buffered  $\text{CH}_3\text{CN}$  spiked with NaOCl. The dark columns showed the fluorescence emission of ThioRB-ester in PBS buffered  $\text{CH}_3\text{CN}$  with no addition. The fluorescence emission intensity at 586 nm was recorded using an excitation wavelength of 560 nm.

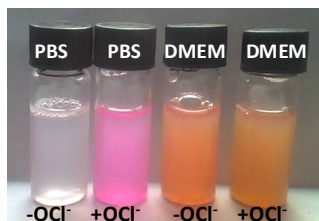

**Fig. S6** Visual images of ThioRB-FITC-MSN ( $1 \text{ mg ml}^{-1}$ ) in DMEM medium spiked with or without NaOCl ( $0.5 \text{ mM}$ ). The images of ThioRB-FITC-MSN in PBS supplemented with or without NaOCl ( $0.5 \text{ mM}$ ) in PBS ( $100 \text{ mM}$ ,  $\text{pH } 7.4$ ) were used as the controls.

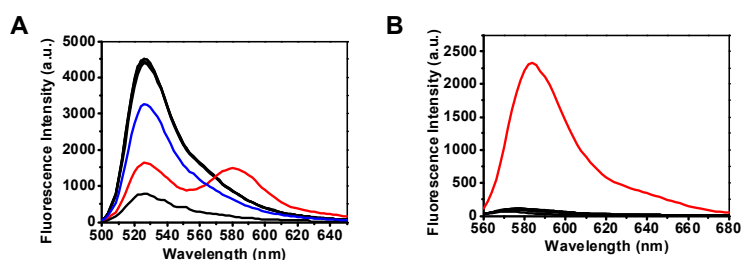

**Fig. S7** Fluorescence emission of ThioRB-FITC-MSN ( $0.5 \text{ mg ml}^{-1}$ ) in PBS ( $\text{pH } 7$ ) supplemented with one of the following species:  $\text{H}_2\text{O}_2$  ( $1 \text{ mM}$ ),  $\text{OH}^-$  ( $1 \text{ mM}$ , in blue),  $\text{ROO}\cdot$  ( $1 \text{ mM}$ ),  $\text{NO}\cdot$  ( $1 \text{ mM}$ , in black, bottom),  $\text{O}_2^{\cdot-}$  ( $1 \text{ mM}$ ) or  $\text{OCl}^-$  ( $0.1 \text{ mM}$ , in red);  $\lambda_{\text{ex}}@490 \text{ nm}$ ; (B)  $\text{H}_2\text{O}_2$  ( $1 \text{ mM}$ ),  $\text{OH}\cdot$  ( $1 \text{ mM}$ ),  $\text{ROO}\cdot$  ( $1 \text{ mM}$ ),  $\text{NO}\cdot$  ( $1 \text{ mM}$ ),  $\text{O}_2^{\cdot-}$  ( $1 \text{ mM}$ ) or  $\text{OCl}^-$  ( $0.1 \text{ mM}$ , in red);  $\lambda_{\text{ex}}@560 \text{ nm}$ . (A) The fluorescence spectra of ThioRB-FITC-MSN were recorded using an excitation wavelength of  $490 \text{ nm}$ , showing the effects of the species on the emission of fluorescein; (B) the fluorescence spectra of ThioRB-FITC-MSN were recorded using an excitation wavelength of  $560 \text{ nm}$ , showing the degree of ThioRB activation.

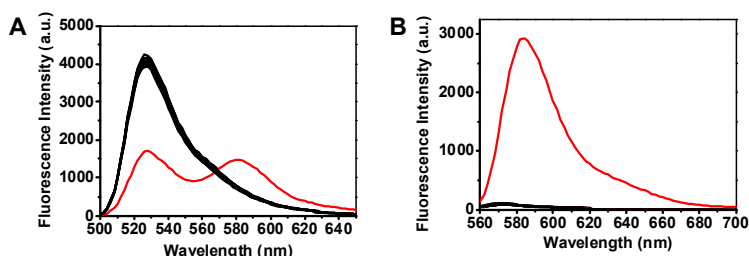

**Fig. S8** Fluorescence of ThioRB-FITC-MSN ( $0.5 \text{ mg ml}^{-1}$ ) in PBS buffer ( $\text{pH } 7.4$ ) supplemented with each of the following species: (A)  $\text{K}^+$  ( $1 \text{ mM}$ ),  $\text{Na}^+$  ( $1 \text{ mM}$ ),  $\text{Cu}^{2+}$  ( $1 \text{ mM}$ ),  $\text{Mn}^{2+}$  ( $1 \text{ mM}$ ),  $\text{Mg}^{2+}$  ( $1 \text{ mM}$ ),  $\text{Ca}^{2+}$  ( $1 \text{ mM}$ ),  $\text{Zn}^{2+}$  ( $0.1 \text{ mM}$ ),  $\text{Fe}^{3+}$  ( $0.1 \text{ mM}$ ),  $\text{Fe}^{2+}$  ( $0.1 \text{ mM}$ ),  $\text{Co}^{2+}$  ( $0.1 \text{ mM}$ ),  $\text{Ni}^{2+}$  ( $0.1 \text{ mM}$ ),  $\text{Pb}^{2+}$  ( $0.1 \text{ mM}$ ) or  $\text{OCl}^-$  ( $0.1 \text{ mM}$ , in red);  $\lambda_{\text{ex}}@490 \text{ nm}$ ; (B)  $\text{K}^+$  ( $1 \text{ mM}$ ),  $\text{Na}^+$  ( $1 \text{ mM}$ ),  $\text{Cu}^{2+}$  ( $1 \text{ mM}$ ),  $\text{Mn}^{2+}$  ( $1 \text{ mM}$ ),  $\text{Mg}^{2+}$  ( $1 \text{ mM}$ ),  $\text{Ca}^{2+}$  ( $1 \text{ mM}$ ),  $\text{Zn}^{2+}$  ( $1 \text{ mM}$ ),  $\text{Fe}^{3+}$  ( $1 \text{ mM}$ ),  $\text{Fe}^{2+}$  ( $1 \text{ mM}$ ),  $\text{Co}^{2+}$  ( $1 \text{ mM}$ ),  $\text{Ni}^{2+}$  ( $1 \text{ mM}$ ),  $\text{Pb}^{2+}$  ( $1 \text{ mM}$ ) or  $\text{OCl}^-$  ( $0.1 \text{ mM}$ , in red); (A) The fluorescence spectra of ThioRB-FITC-MSN were recorded using  $\lambda_{\text{ex}}@490 \text{ nm}$ , showing the effects of the species on the emission of fluorescein; (B) the fluorescence spectra of ThioRB-FITC-MSN were recorded using  $\lambda_{\text{ex}}@560 \text{ nm}$ , showing the degree of ThioRB activation.

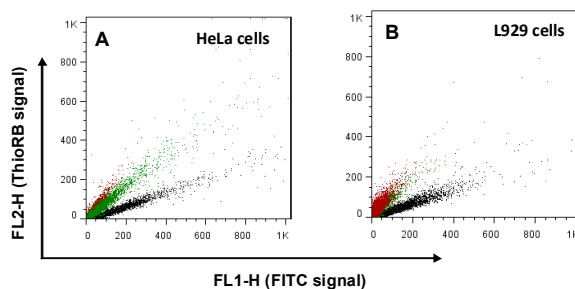

**Fig. S9** Flow cytometry analysis of lysosomal HOCl in HeLa (A) and L929 cells (B) with ThioRB-FITC-MSN under single wavelength excitation ( $\lambda_{ex}@488$  nm). The cell populations marked in green were incubated in PBS supplemented with 0.5 mM NaOCl and the cell populations marked in red were treated with 1 mM NaOCl. The control cell populations shown in dark was incubated in PBS with no addition. The fluorescence of FITC (FL1) was collected @510-535 nm while that of activated ThioRB signal was collected @565-625 nm (FL2).

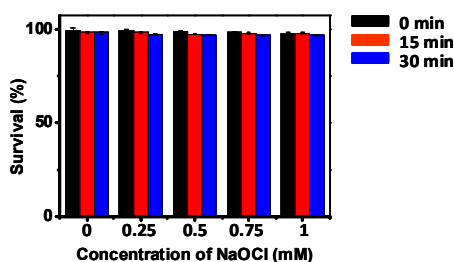

**Fig. S10** Cytotoxicity of NaOCl on L929 cells. L929 cells were incubated with various amounts of NaOCl in PBS (0-1 mM) for 0-30 min as indicated and then stained with trypan blue. Cell viability was determined by the trypan blue exclusion assay.
